# Supplementary material for: Microfluidics Temperature Compensating and Monitoring Based on Liquid Metal Heat Transfer
Source: MDPI journal article supplement (doi:10.3390/mi13050792), 2022-05-19
Supplement: s1 [file s1]

# Microfluidics Temperature Compensating and Monitoring Based on Liquid Metal Heat Transfer

## 1. The grid discretization/ independence and convergence solving

Thanks for your point. The finite element (FEM) software COMSOL Multiphysics 5.4 is used for simulation. In this model, free triangle units are employed as domain elements due to the excellent shape adaptation characteristics; the corresponding diagram is shown in Figure S1. The domain elements around the microfluid and sensor are denser than overall, thus achieving accurate calculation of the temperature.

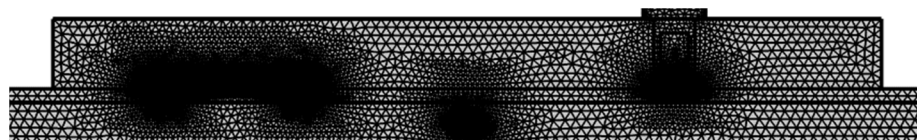

**Figure S1.** Discrete grid for the simulation model.

According to the physical field, the model is solved using the BDF (backward difference formula) method, by which accuracy varies between first and fifth orders. The default CFL number is set as 5 in this model. For the convergence criterion, the iteration was stopped until the solution reduces to within the desired tolerance. The relative tolerance of this model is set as 0.01.

Regarding the grid division independence, the physical-controlled division method is chosen. The statistical results of different grid “domains” and “boundaries” are shown in Table S1. To optimize the grid selection, we investigated the relationship between the steady-state temperature of the glass surface and the number of domain elements, as shown in Figure S2. When the numbers of domain elements reach 9251, the steady-state temperature of the glass surface almost no longer changes. So we choose 9251 grids for model discretization.

**Table S1.** Numbers of the domain and boundary elements in different element sizes.

| Element sizes    | Domain elements | Boundary elements |
|------------------|-----------------|-------------------|
| extremely coarse | 3094            | 580               |
| extra coarse     | 3491            | 606               |
| coarser          | 4566            | 676               |
| coarse           | 5272            | 683               |
| normal           | 6477            | 735               |
| fine             | 7752            | 784               |
| finer            | 9251            | 830               |
| extra fine       | 14687           | 917               |
| Extremely fine   | 19539           | 1119              |

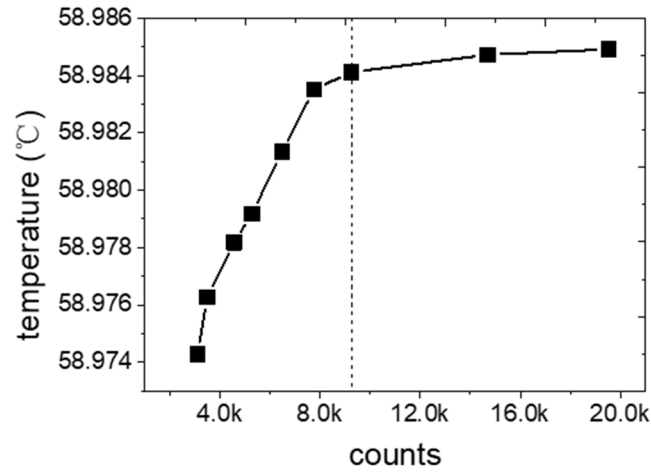

**Figure S2.** Grid independence verification.

## 2. The physical and geometry parameters in our study are set as in Table S2.

**Table S2.** Parameter settings in the fluid-structure interacted simulation model.

| parameters     | value             | unit                 | description                                         |
|----------------|-------------------|----------------------|-----------------------------------------------------|
| $\rho_{Al}$    | $2.7 \times 10^3$ | [kg/m <sup>3</sup> ] | The density of the heater and sensor                |
| $\rho_{glass}$ | $2.5 \times 10^3$ | [kg/m <sup>3</sup> ] | The density of the glass slide                      |
| $\rho_{fluid}$ | 1000              | [kg/m <sup>3</sup> ] | The density of the fluid                            |
| $\rho_{air}$   | 1.293             | [kg/m <sup>3</sup> ] | The density of the air                              |
| $\rho_{Ga}$    | $5.9 \times 10^3$ | [kg/m <sup>3</sup> ] | The density of the liquid metal                     |
| $k_{Al}$       | 237               | [W/(m·K)]            | The thermal conductivity of the heater and sensor   |
| $k_{glass}$    | 0.77              | [W/(m·K)]            | The thermal conductivity of the glass slide         |
| $k_{fluid}$    | 0.598             | [W/(m·K)]            | The thermal conductivity of the fluid               |
| $k_{air}$      | 0.0267            | [W/(m·K)]            | The thermal conductivity of the air                 |
| $k_{Ga}$       | 40.6              | [W/(m·K)]            | The thermal conductivity of the liquid metal        |
| $C_{p\_Al}$    | 0.88              | [kJ/(kg·K)]          | The specific heat capacity of the heater and sensor |
| $C_{p\_glass}$ | 0.837             | [kJ/(kg·K)]          | The specific heat capacity of the glass slide       |
| $C_{p\_fluid}$ | 4.184             | [kJ/(kg·K)]          | The specific heat capacity of the fluid             |
| $C_{p\_air}$   | 1.005             | [kJ/(kg·K)]          | The specific heat capacity of the air               |
| $C_{p\_Ga}$    | 0.37              | [kJ/(kg·K)]          | The specific heat capacity of the liquid metal      |
| $\eta_{fluid}$ | $1.08e^{-3}$      | [Pa·s]               | The viscosity of the fluid                          |
| $\eta_{Ga}$    | $1.6e^{-3}$       | [Pa·s]               | The viscosity of the liquid metal                   |

|                |           |                         |                                                         |
|----------------|-----------|-------------------------|---------------------------------------------------------|
| $p_0$          | 30        | [W]                     | Heating power                                           |
| $h_c$          | 10        | [W/(m <sup>2</sup> ·K)] | Natural convective heat transfer coefficient            |
| $\varepsilon$  | 0.8       |                         | The emissivity of the material                          |
| $m_{asp}$      | 0.4       |                         | The asperities average slope surface roughness          |
| $\sigma_{asp}$ | 5         | [μm]                    | The asperities average height surface roughness         |
| $P$            | 53.3      | [N/m <sup>2</sup> ]     | The contact pressure between the heater and glass slide |
| $H_c$          | 3         | [GPa]                   | The microhardness of glass                              |
| $h_{gap}$      | 10        | [W/(m <sup>2</sup> ·K)] | Gap thermal resistance heat transfer coefficient        |
| $r$            | 0.7       |                         | The heat partition coefficient                          |
| $d_1$          | 2         | [mm]                    | The diameter of the PT 100 sensor                       |
| $d_2$          | n x $d_1$ | [mm]                    | The diameter of the through-hole                        |
| $T_0$          | 25        | [degC]                  | The room temperature                                    |

---
